# Supplementary material for: Native T1 mapping and extracellular volume fraction for differentiation of myocardial diseases from normal CMR controls in routine clinical practice
Source: Springer Nature journal article supplement (doi:10.1186/s12872-021-02086-3), 2021-06-03
Supplement: MOESM1 [file 19226050]

**Additional file 1.** Cutoff values from receiver operating characteristic (ROC) curve analysis of native T1 in myocardial disease and CAD Case: control (1:1)

|                                | Cutoff<br>(ms) | Sensitivity (%)<br>(95% CI) | Specificity (%)<br>(95% CI) | PPV (%)<br>(95% CI) | NPV (%)<br>(95% CI) |
|--------------------------------|----------------|-----------------------------|-----------------------------|---------------------|---------------------|
| <b>Amyloidosis (n=11)</b>      |                |                             |                             |                     |                     |
| - Mid LV SAX native T1         | 1,340.5        | 100 (74.1-100.0)            | 72.7 (43.4-90.3)            | 78.6 (52.4-92.4)    | 100.0 (67.6-100.0)  |
| - Septum native T1             | 1,370.3        | 81.8 (52.3-94.9)            | 90.9 (62.3-98.4)            | 90.0 (59.6-98.2)    | 83.3 (55.2-95.3)    |
| <b>DCM (n=137)</b>             |                |                             |                             |                     |                     |
| - Mid LV SAX native T1         | 1,337.5        | 56.2 (47.8-64.2)            | 86.9 (80.2-91.5)            | 81.1 (72.0-87.7)    | 66.5 (59.3-73.0)    |
| - Septum native T1             | 1,341.3        | 55.5 (47.1-63.5)            | 82.5 (75.3-87.9)            | 76.0 (66.8-83.3)    | 64.9 (57.6-71.6)    |
| <b>HCM (n=112)</b>             |                |                             |                             |                     |                     |
| - Mid LV SAX native T1         | 1,332.5        | 53.6 (44.4-62.5)            | 86.6 (79.1-91.7)            | 80.0 (69.6-87.5)    | 65.1 (57.2-72.3)    |
| - Septum native T1             | 1,346.3        | 53.6 (44.4-62.5)            | 88.4 (81.1-93.1)            | 82.2 (71.9-89.3)    | 65.6 (57.7-72.7)    |
| <b>Myocarditis (n=17)</b>      |                |                             |                             |                     |                     |
| - Mid LV SAX native T1         | 1,354.5        | 41.2 (21.6-64.0)            | 94.1 (73.0-99.0)            | 87.5 (52.9-97.8)    | 61.5 (42.5-77.6)    |
| - Septum native T1             | 1,359.8        | 52.9 (31.0-73.8)            | 94.1 (73.0-99.0)            | 90.0 (59.6-98.2)    | 66.7 (46.7-82.0)    |
| <b>CAD</b>                     |                |                             |                             |                     |                     |
| - Mid LV SAX native T1 (n=287) | 1,341.5        | 30.7 (25.6-36.2)            | 93.4 (90.0-95.8)            | 82.2 (73.9-88.3)    | 57.7 (53.1-62.0)    |
| - Septum native T1 (n=242)     | 1,342.8        | 36.8 (31.0-43.0)            | 81.7 (76.9-85.7)            | 62.7 (54.5-70.2)    | 60.8 (55.8-65.5)    |

A *p*-value<0.05 indicates statistical significance

**Abbreviations:** CAD, coronary heart disease; AUC, area under the ROC curve; CI, confidence interval; PPV, positive predictive value; NPV, negative predictive value; DCM, dilated cardiomyopathy; HCM, hypertrophic cardiomyopathy
