# Supplementary material for: Native T1 mapping and extracellular volume fraction for differentiation of myocardial diseases from normal CMR controls in routine clinical practice
Source: Springer Nature journal article supplement (doi:10.1186/s12872-021-02086-3), 2021-06-03
Supplement: MOESM2 [file 19226050]

**Additional file 2.** Cutoff values from receiver operating characteristic (ROC) curve analysis of mid LV short-axis ECV in myocardial disease and CAD (1:1)

|                                    | <b>Cutoff (%)</b> | <b>Sensitivity (%) (95% CI)</b> | <b>Specificity (%) (95% CI)</b> | <b>PPV (%) (95% CI)</b> | <b>NPV (%) (95% CI)</b> |
|------------------------------------|-------------------|---------------------------------|---------------------------------|-------------------------|-------------------------|
| <b>Amyloidosis</b>                 |                   |                                 |                                 |                         |                         |
| - Mid LV SAX actual ECV (n=8)      | 40.0              | 87.5 (52.9-97.8)                | 100.0 (67.6-100.0)              | 100.0 (64.6-100.0)      | 88.9 (56.5-98.0)        |
| - Mid LV SAX synthetic ECV (n=11)  | 32.6              | 81.8 (52.3-94.9)                | 100.0 (74.1-100.0)              | 100.0 (70.1-100.0)      | 84.6 (57.8-95.7)        |
| <b>DCM</b>                         |                   |                                 |                                 |                         |                         |
| - Mid LV SAX actual ECV (n=106)    | 28.8              | 51.9 (42.5-61.2)                | 79.2 (70.6-85.9)                | 71.4 (60.5-80.3)        | 62.2 (53.8-70.0)        |
| - Mid LV SAX synthetic ECV (n=137) | 27.0              | 71.5 (63.5-78.4)                | 56.9 (48.6-64.9)                | 62.4 (54.6-69.6)        | 66.7 (57.7-74.6)        |
| <b>HCM</b>                         |                   |                                 |                                 |                         |                         |
| - Mid LV SAX actual ECV (n=84)     | 31.8              | 25.0 (17.0-35.2)                | 92.4 (84.4-96.5)                | 77.8 (59.2-89.4)        | 53.7 (45.3-61.8)        |
| - Mid LV SAX synthetic ECV (n=112) | 29.7              | 46.4 (37.5-55.6)                | 82.1 (74.0-88.1)                | 72.2 (61.0-81.2)        | 60.5 (52.6-67.9)        |
| <b>Myocarditis</b>                 |                   |                                 |                                 |                         |                         |
| - Mid LV SAX actual ECV (n=13)     | 30.5              | 53.8 (29.1-76.8)                | 85.7 (60.1-96.0)                | 77.8 (45.3-93.7)        | 66.7 (43.7-83.7)        |
| - Mid LV SAX synthetic ECV (n=17)  | 31.3              | 41.2 (21.6-64.0)                | 100.0 (81.6-100.0)              | 100.0 (64.6-100.0)      | 63.0 (44.2-78.5)        |
| <b>CAD</b>                         |                   |                                 |                                 |                         |                         |
| - Mid LV SAX actual ECV (n=218)    | 27.9              | 48.2 (41.6-54.8)                | 60.7 (54.2-66.9)                | 54.4 (47.4-61.3)        | 54.6 (48.4-60.7)        |
| - Mid LV SAX synthetic ECV (n=287) | 27.3              | 54.0 (48.2-59.7)                | 55.9 (50.1-61.5)                | 54.8 (48.9-60.5)        | 55.1 (49.4-60.7)        |

A *p*-value<0.05 indicates statistical significance

**Abbreviations:** CAD, coronary heart disease; AUC, area under the ROC curve; CI, confidence interval; PPV, positive predictive value; NPV, negative predictive value; ECV, extracellular volume fraction; DCM, dilated cardiomyopathy; HCM, hypertrophic cardiomyopathy
